# Supplementary material
Source: HighWire-hosted journal article supplement (https://bmjopen.bmj.com/content/9/1/e024778)
Supplement: inline-supplementary-material-1 [file inline-supplementary-material-1.pdf]

Appendix 1 – HPPD, number of nursing staff and number of beds by ward

| Ward                         | Number of beds | Number of Nursing Staff | HPPD Mean (SD) | Skill Mix* Mean (SD) |
|------------------------------|----------------|-------------------------|----------------|----------------------|
| Oncology                     | 40             | 109                     | 7.2 (0.8)      | 0.71 (0.02)          |
| Medical – Gastro             | 36             | 72                      | 6.4 (1)        | 0.50 (0.07)          |
| Coronary Care                | 23             | 48                      | 7.2 (0.8)      | 0.83 (0.06)          |
| Cardiology                   | 36             | 62                      | 5.6 (0.7)      | 0.51 (0.05)          |
| Trauma 1                     | 28             | 59                      | 7.3 (1.1)      | 0.54 (0.06)          |
| General Medicine 1           | 30             | 47                      | 6.5 (1)        | 0.45 (0.05)          |
| General Medicine 2           | 34             | 58                      | 5.5 (0.8)      | 0.58 (0.05)          |
| Trauma 2                     | 26             | 55                      | 6.8 (0.8)      | 0.55 (0.05)          |
| Orthopaedics 1               | 36             | 46                      | 6.4 (1.2)      | 0.56 (0.05)          |
| Orthopaedics 2               | 36             | 62                      | 7.4 (1.2)      | 0.52 (0.05)          |
| Orthopaedics 3               | 13             | 31                      | 8.1 (1.3)      | 0.56 (0.06)          |
| Surgical 1                   | 30             | 56                      | 5.2 (0.5)      | 0.60 (0.05)          |
| Surgical 2                   | 32             | 61                      | 5.4 (0.7)      | 0.59 (0.05)          |
| Respiratory 1                | 36             | 60                      | 5.4 (0.8)      | 0.50 (0.07)          |
| Respiratory 2                | 40             | 83                      | 7.1 (0.6)      | 0.67 (0.04)          |
| Medicine for older people 1  | 13             | 79                      | 7.7 (1.4)      | 0.50 (0.06)          |
| Medicine for older people 2  | 30             | 25                      | 7.3 (0.9)      | 0.46 (0.05)          |
| Medicine for older people 3  | 23             | 73                      | 6.5 (0.6)      | 0.52 (0.04)          |
| Medicine for older people 4  | 29             | 84                      | 6.9 (0.8)      | 0.52 (0.05)          |
| Medicine for older people 5  | 30             | 49                      | 7.6 (0.9)      | 0.47 (0.08)          |
| Stroke Unit 1                | 25             | 62                      | 7 (0.5)        | 0.46 (0.05)          |
| Stroke Unit 2                | 34             | 85                      | 6.7 (0.8)      | 0.53 (0.06)          |
| Renal 1                      | 10             | 47                      | 11.2 (1.6)     | 0.78 (0.06)          |
| Renal 2                      | 26             | 56                      | 8.4 (1)        | 0.79 (0.05)          |
| Renal 3                      | 14             | 31                      | 8.6 (1.2)      | 0.75 (0.05)          |
| Gynaecology                  | 22             | 46                      | 7.9 (1.5)      | 0.66 (0.07)          |
| Head & Neck                  | 27             | 51                      | 6.3 (1.2)      | 0.68 (0.07)          |
| Medical Assessment Unit      | 58             | 155                     | 8.9 (1.3)      | 0.71 (0.03)          |
| Private Patients Unit        | 13             | 30                      | 8.3 (1.8)      | 0.69 (0.05)          |
| Surgical Assessment Unit     | 28             | 53                      | 5.2 (0.9)      | 0.65 (0.06)          |
| Surgical High Intensity Unit | 10             | 31                      | 10 (1.5)       | 0.79 (0.06)          |
| Urology                      | 31             | 78                      | 5.6 (0.7)      | 0.55 (0.04)          |

\* Defined as  $RN-HPPD / (RN-HPPD + HCA-HPPD)$
